# Supplementary material for: An appraisal of gene targets for phylogenetic classification of canine distemper virus: Is the hemagglutinin the best candidate?
Source: PubMed Central journal article supplement — Virus Res. 2023 Jan 10;325:199043. doi: 10.1016/j.virusres.2023.199043 (PMC10194282; doi:10.1016/j.virusres.2023.199043), 2023-01-10

CG

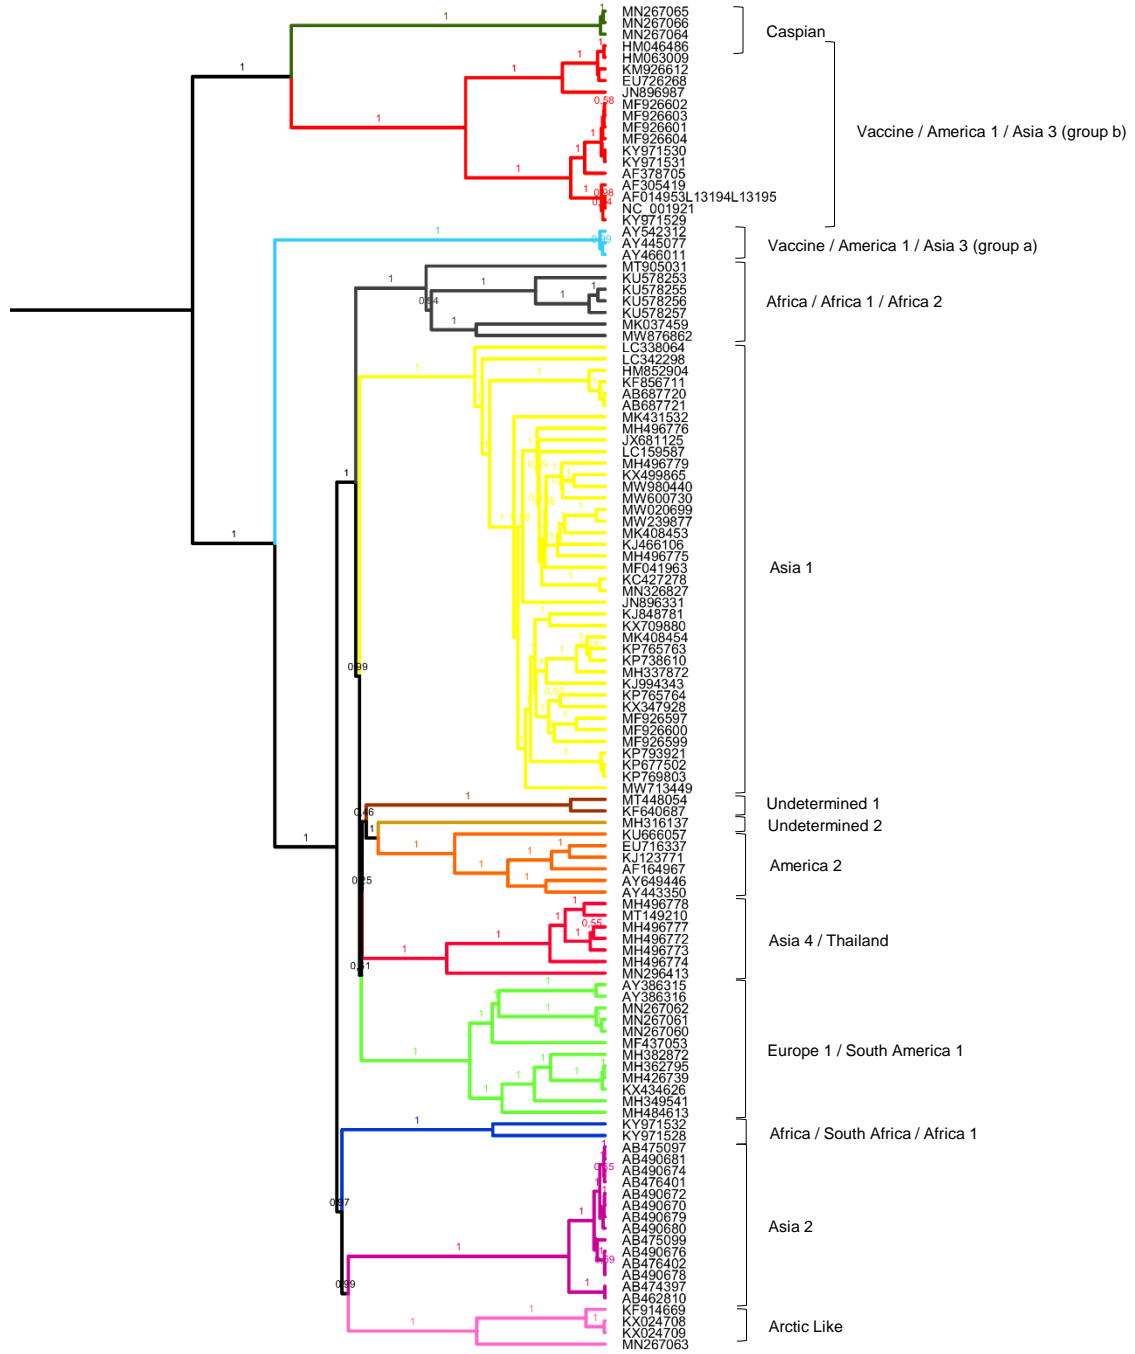

0.005

N

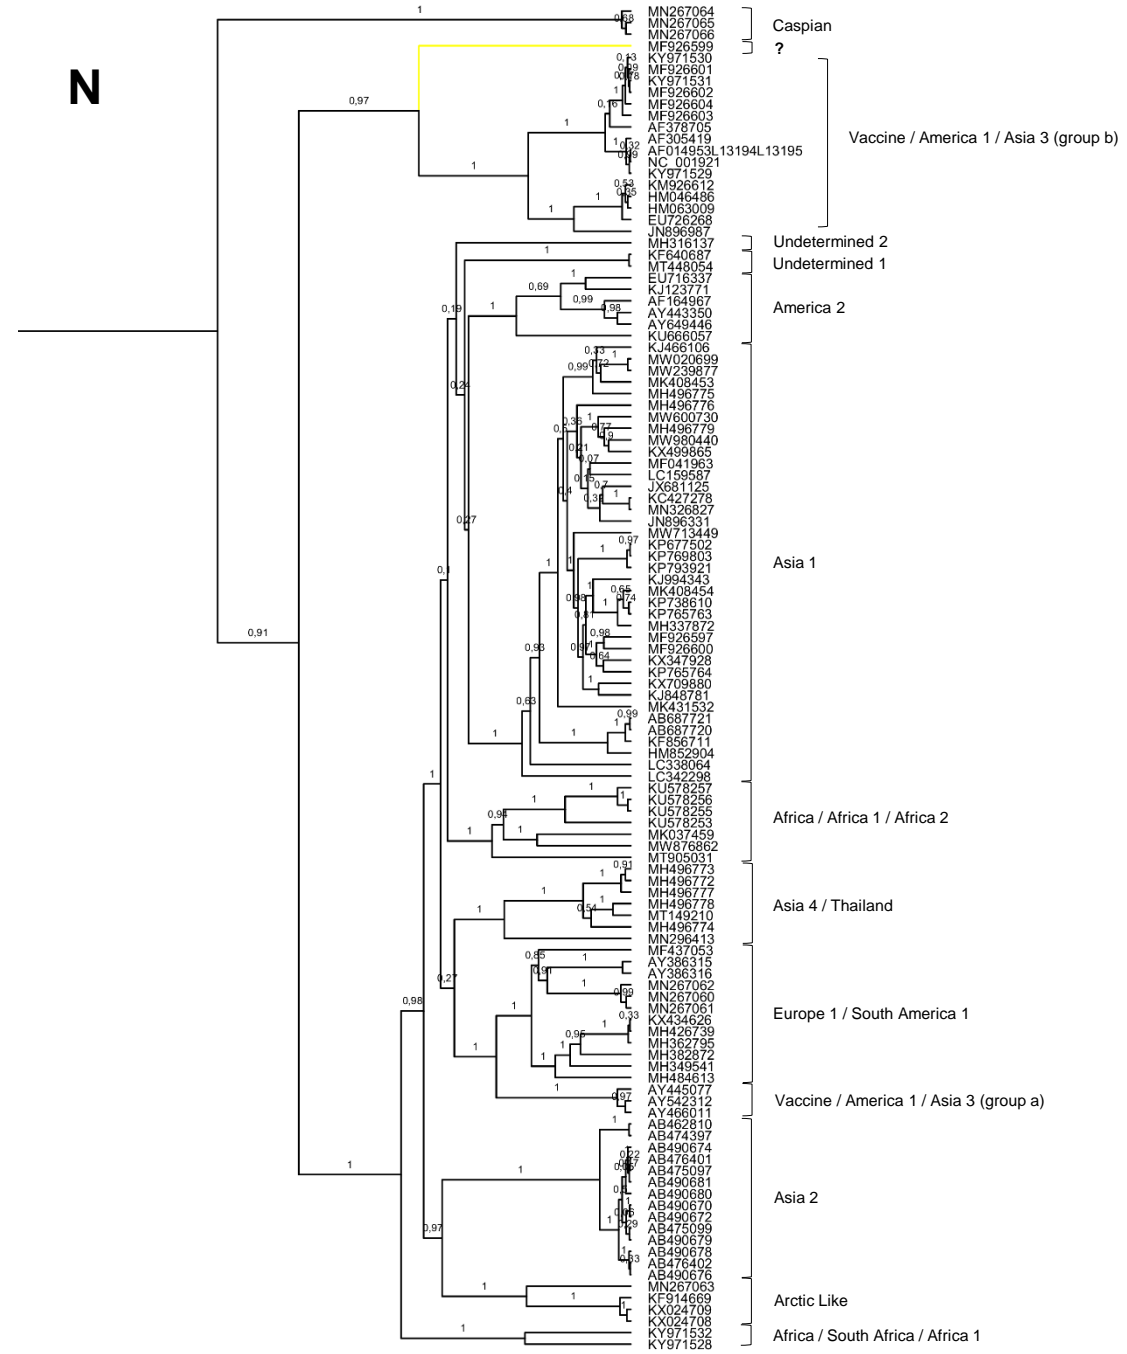

0.006

**P**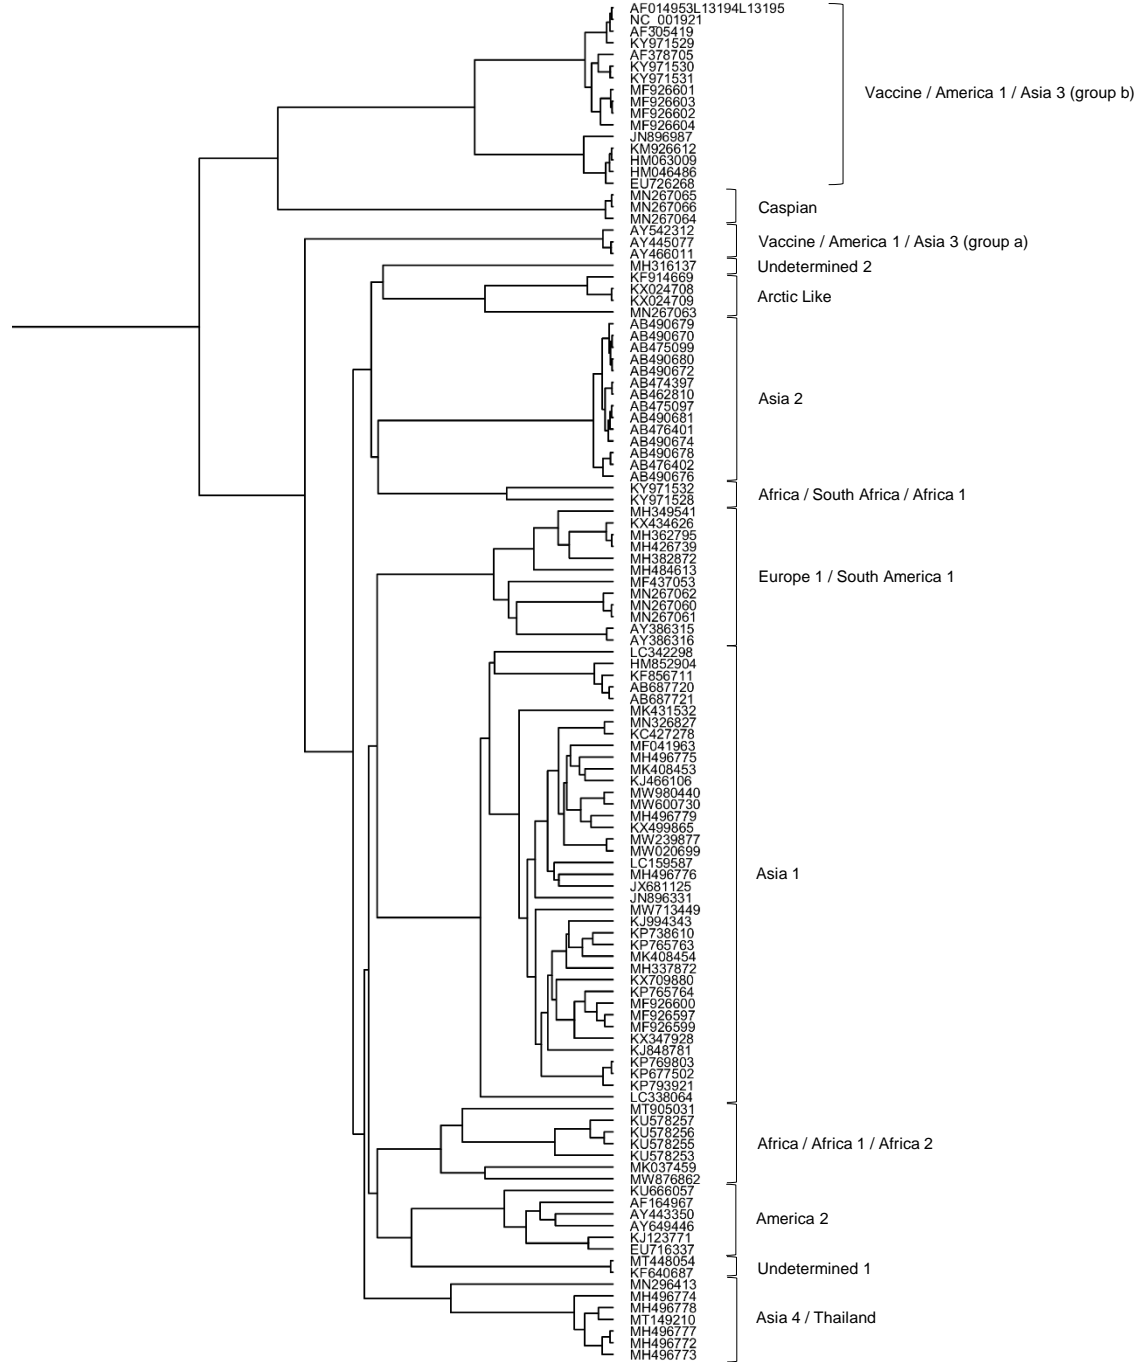

0.005

**C**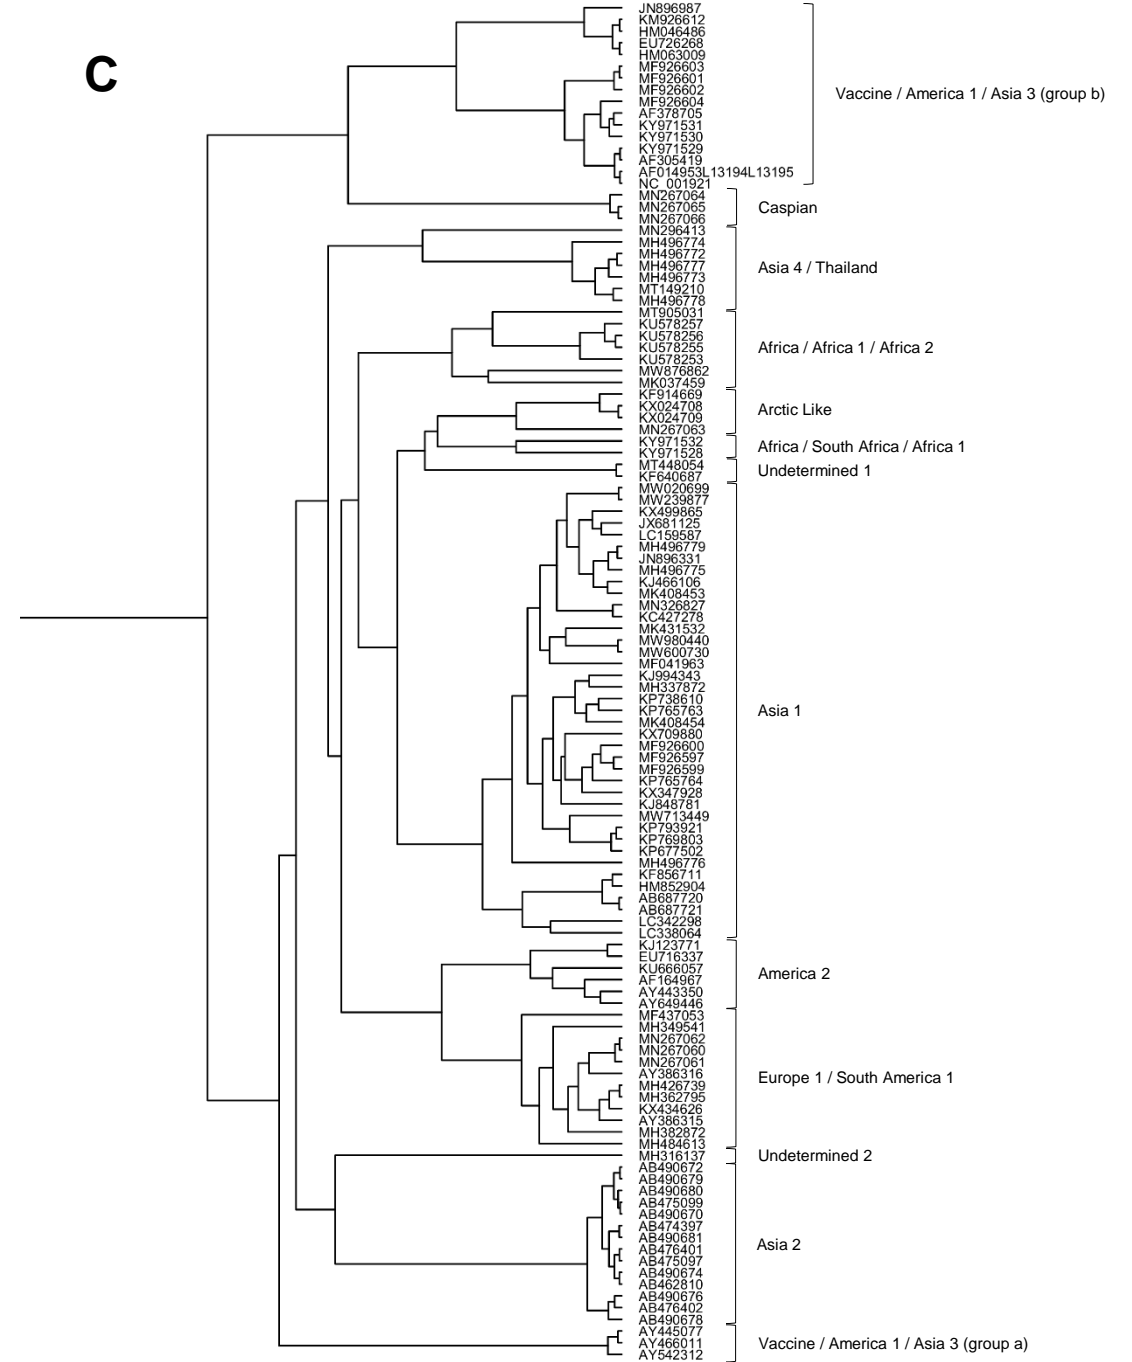

0.004

**M****Vaccine / America 1 / Asia 3 (group b) + Asia 1**

Caspian

Africa / Africa 1 / Africa 2

Europe 1 / South America 1

Asia 4 / Thailand

Undetermined 1

**Vaccine / America 1 / Asia 3 (group a) + America 2**

Undetermined 2

Asia 1

Arctic Like

Africa / South Africa / Africa 1

Asia 2

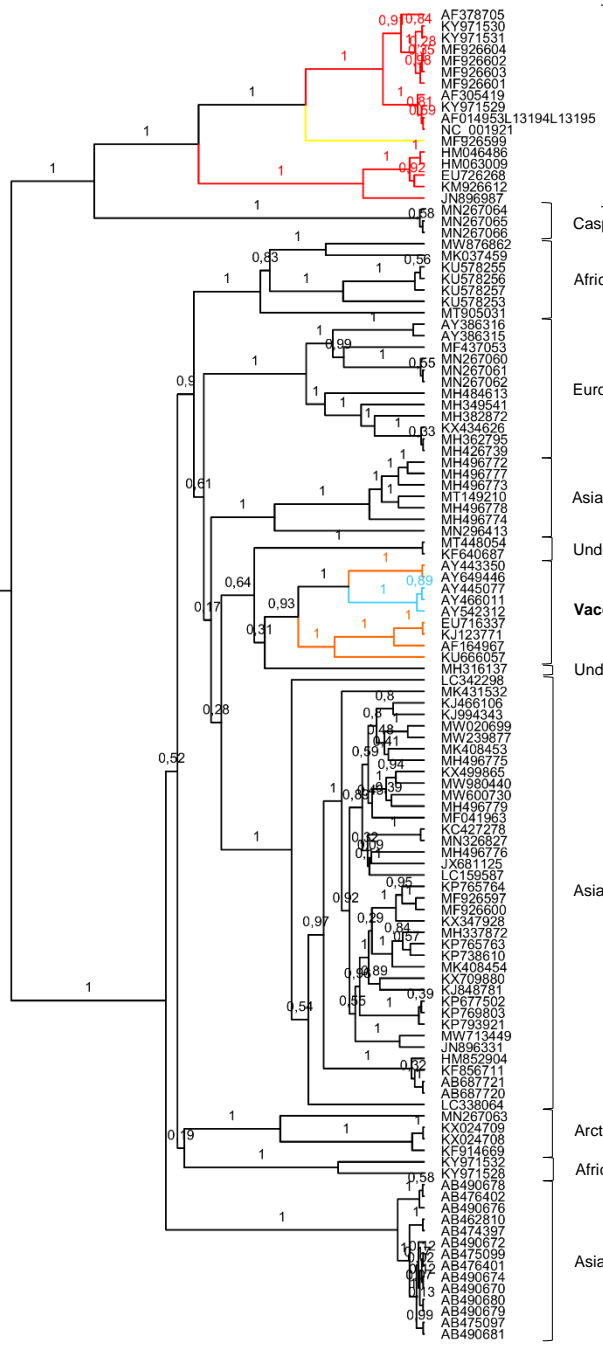

0.007

**F**

Arctic Like

Asia 2

Africa / South Africa / Africa 1

Africa / Africa 1 / Africa 2

Europe 1 / South America 1

Asia 1

Undetermined 2

America 2

**Vaccine / America 1 / Asia 3 (group a) + America 2**

Undetermined 1

Asia 4 / Thailand

Arctic Like

Africa / South Africa / Africa 1

Asia 2

Caspian

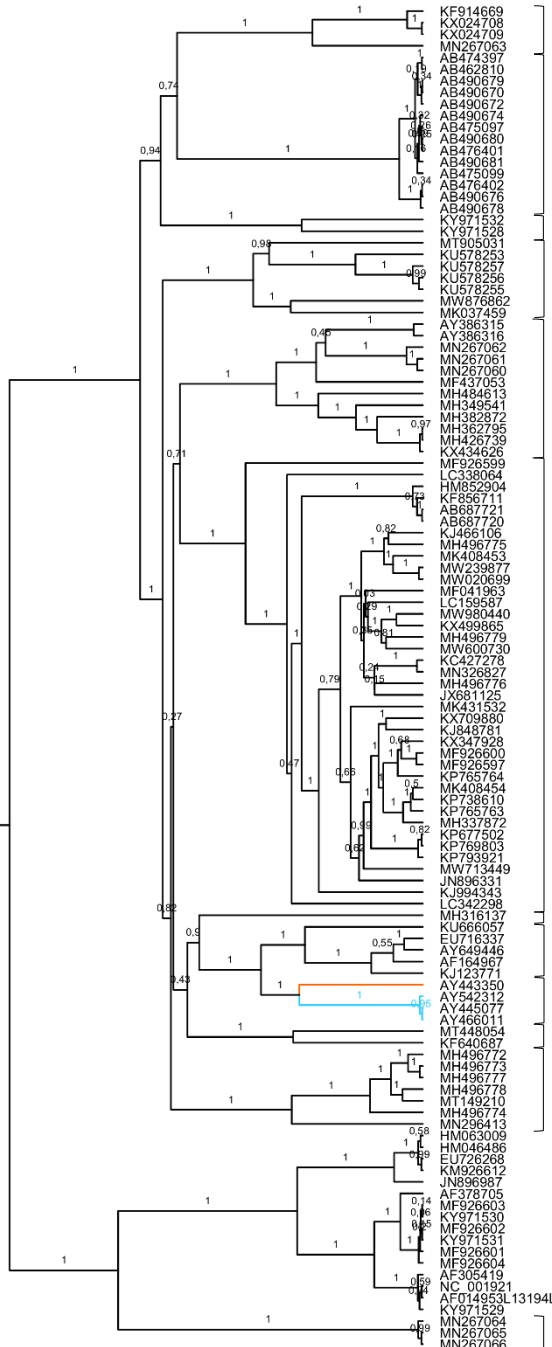

0.007

H

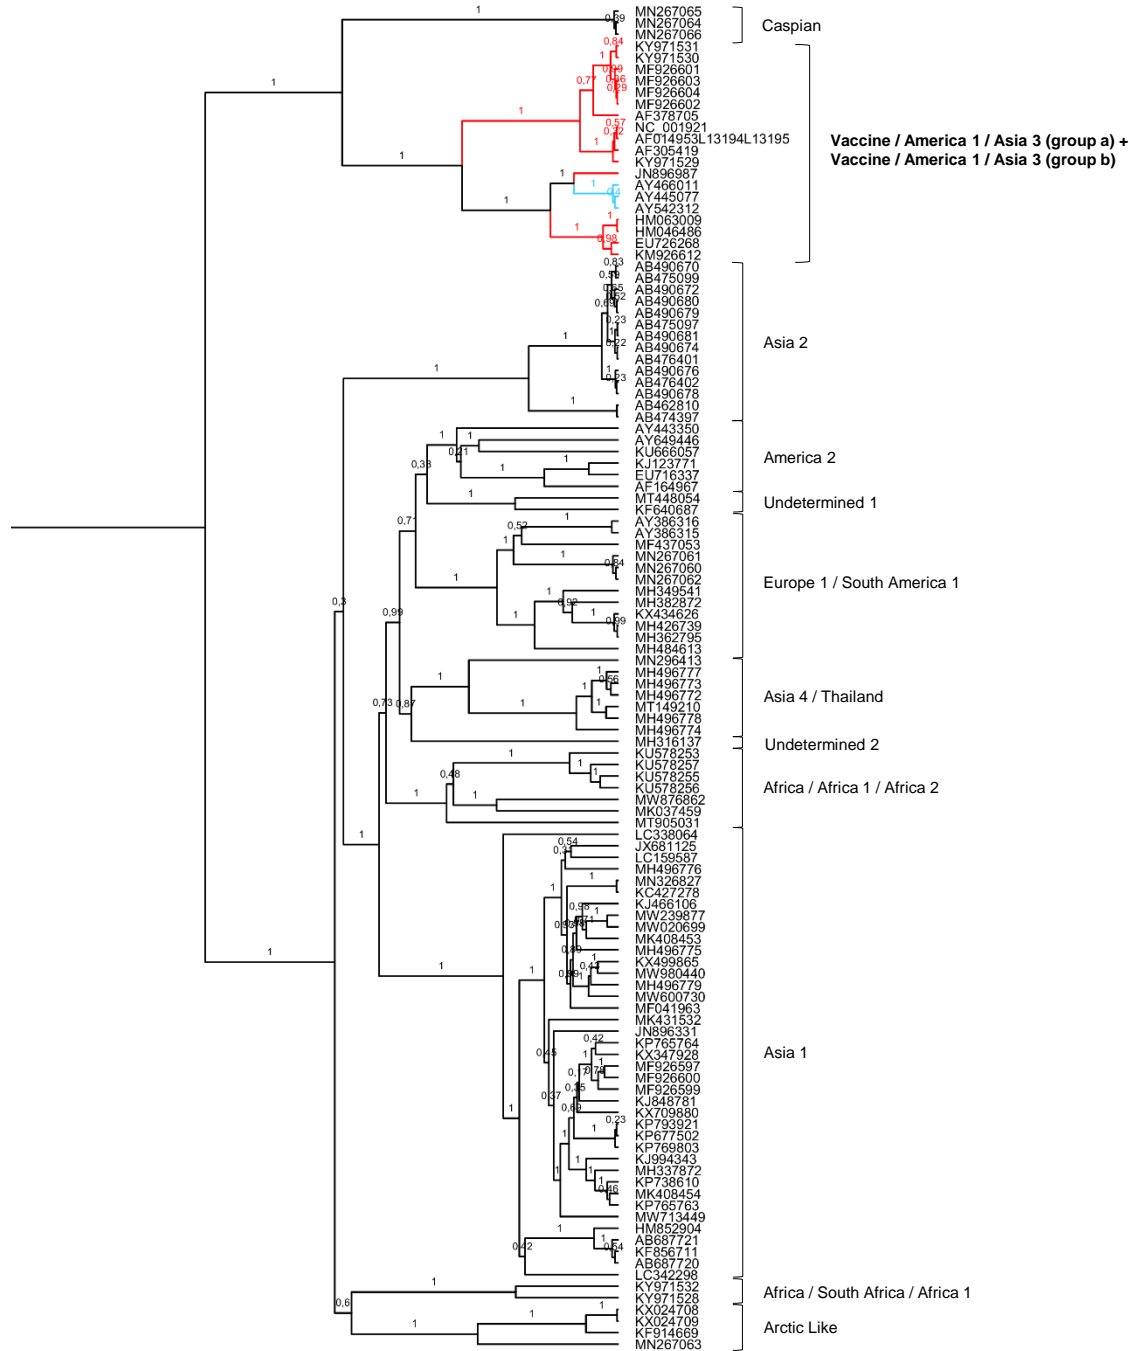

L

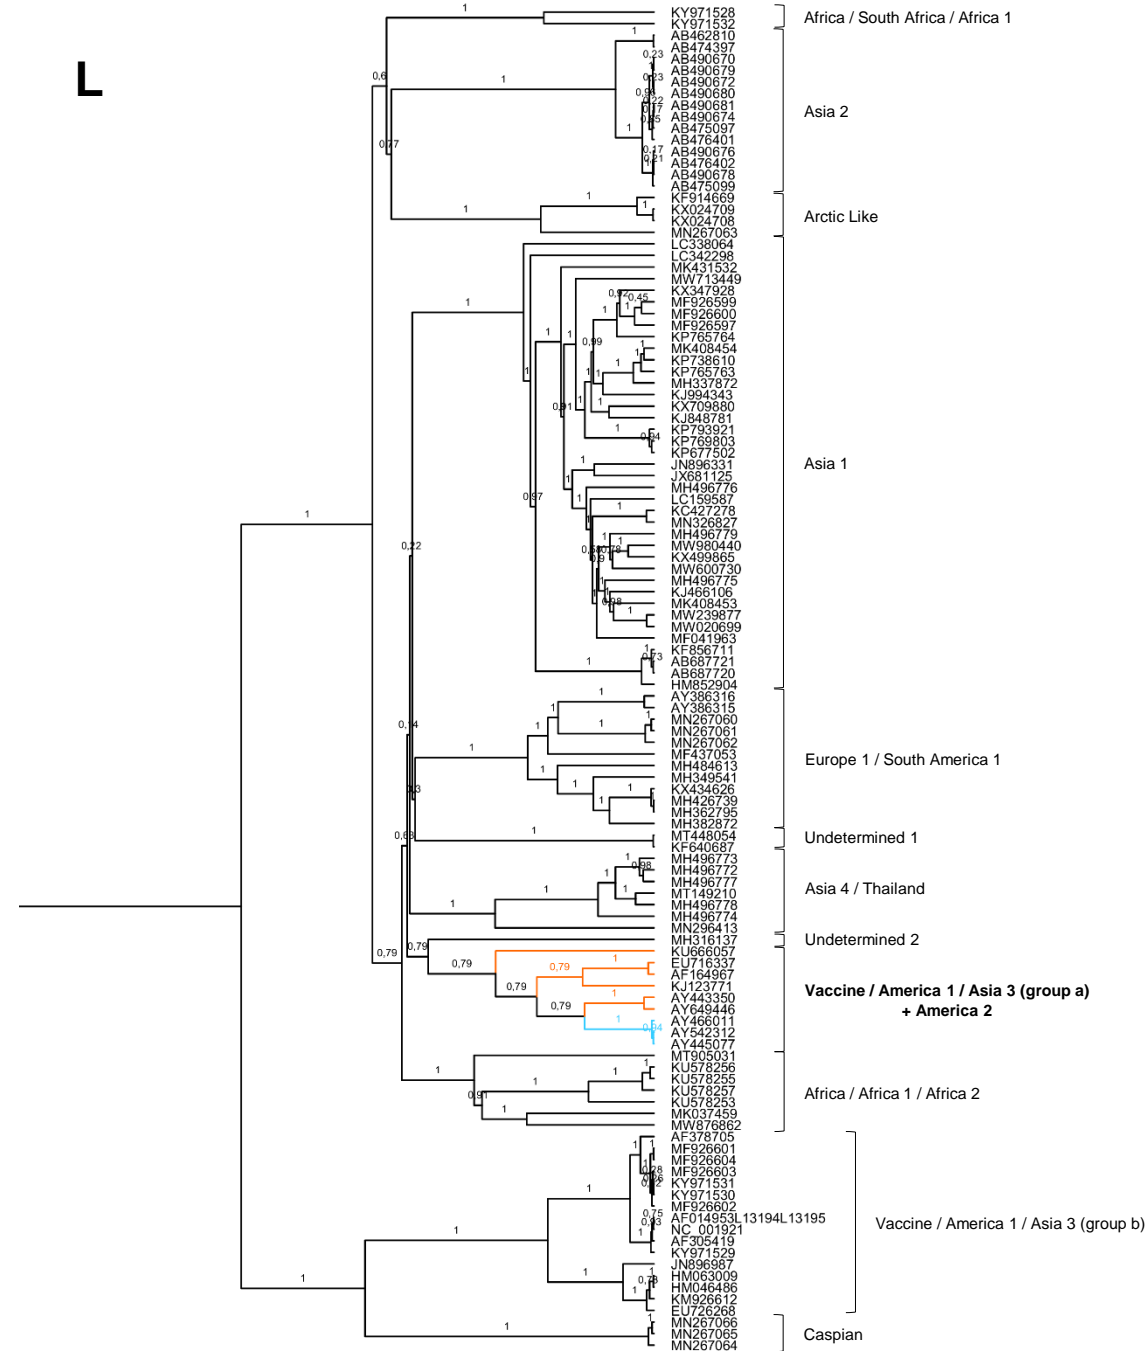

Supplement: mmc2.pdf [file mmc2.pdf]
