# Supplementary material for: An appraisal of gene targets for phylogenetic classification of canine distemper virus: Is the hemagglutinin the best candidate?
Source: PubMed Central journal article supplement — Virus Res. 2023 Jan 10;325:199043. doi: 10.1016/j.virusres.2023.199043 (PMC10194282; doi:10.1016/j.virusres.2023.199043), 2023-01-10
Supplement: mmc4.pdf [file mmc4.pdf]

N

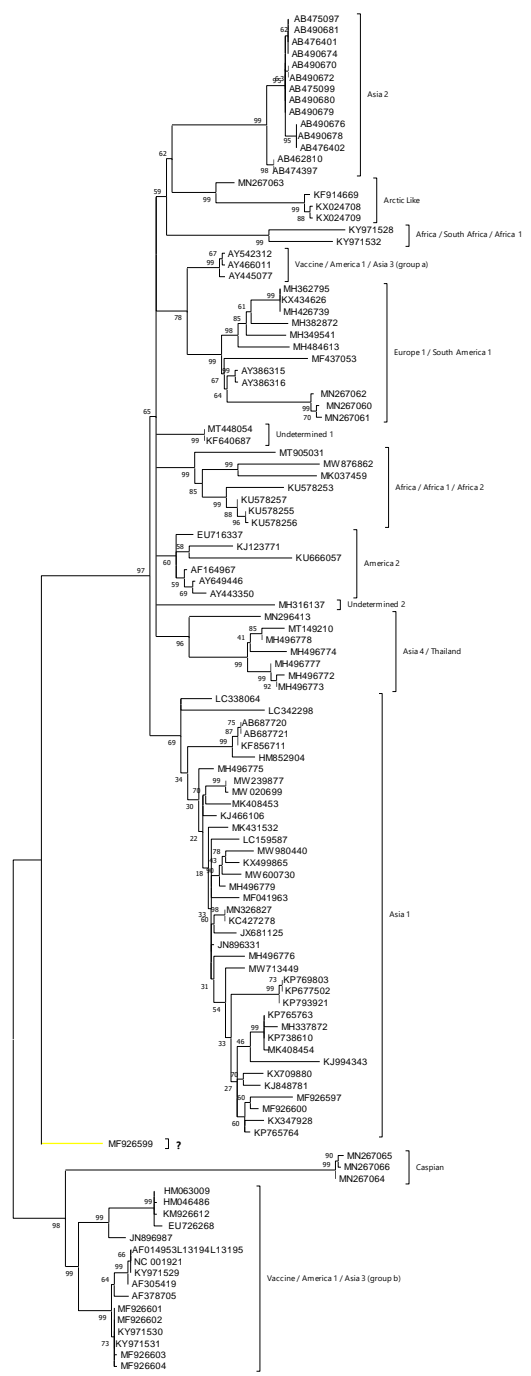

P

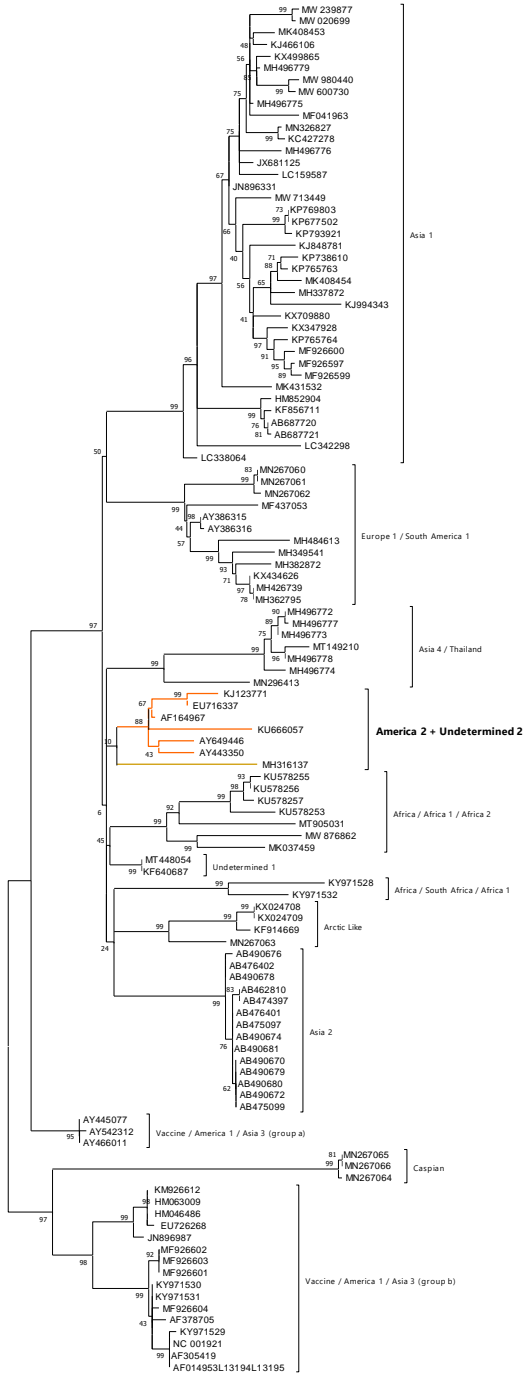

M

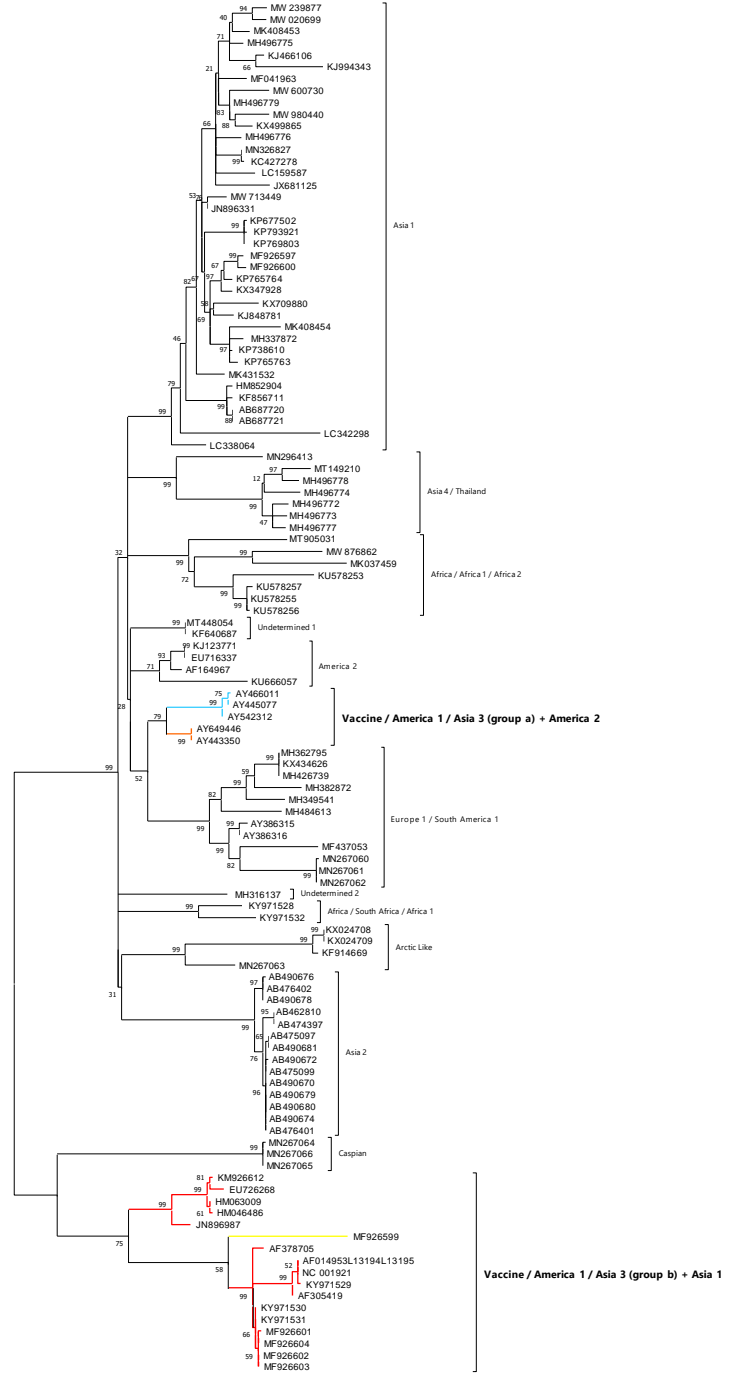

F

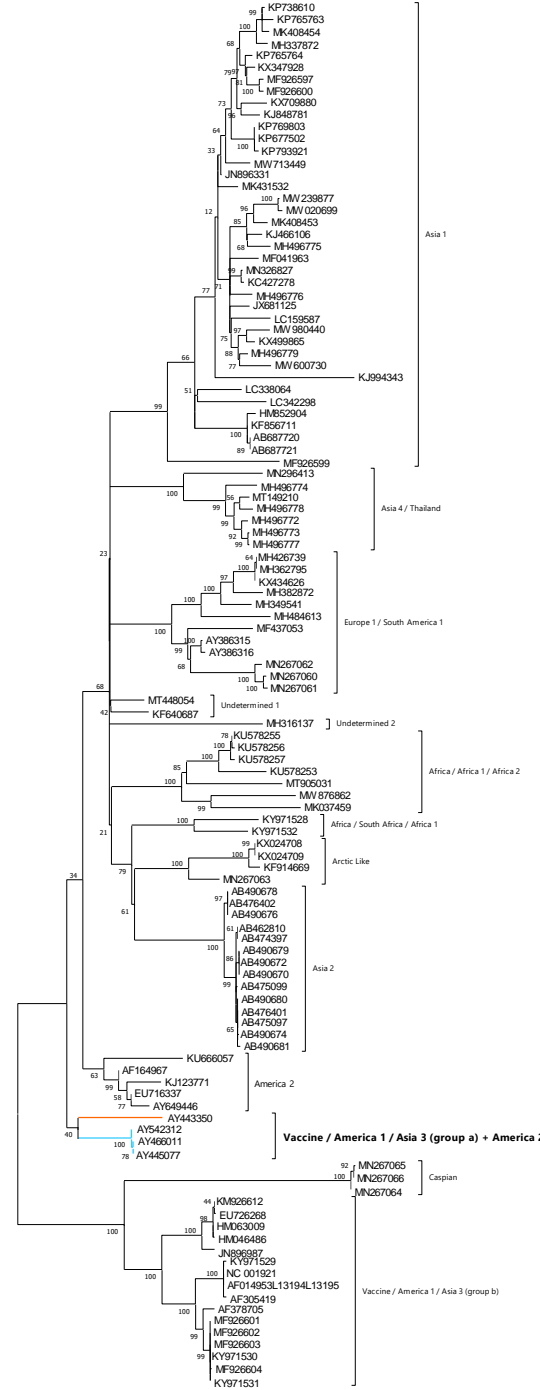

L

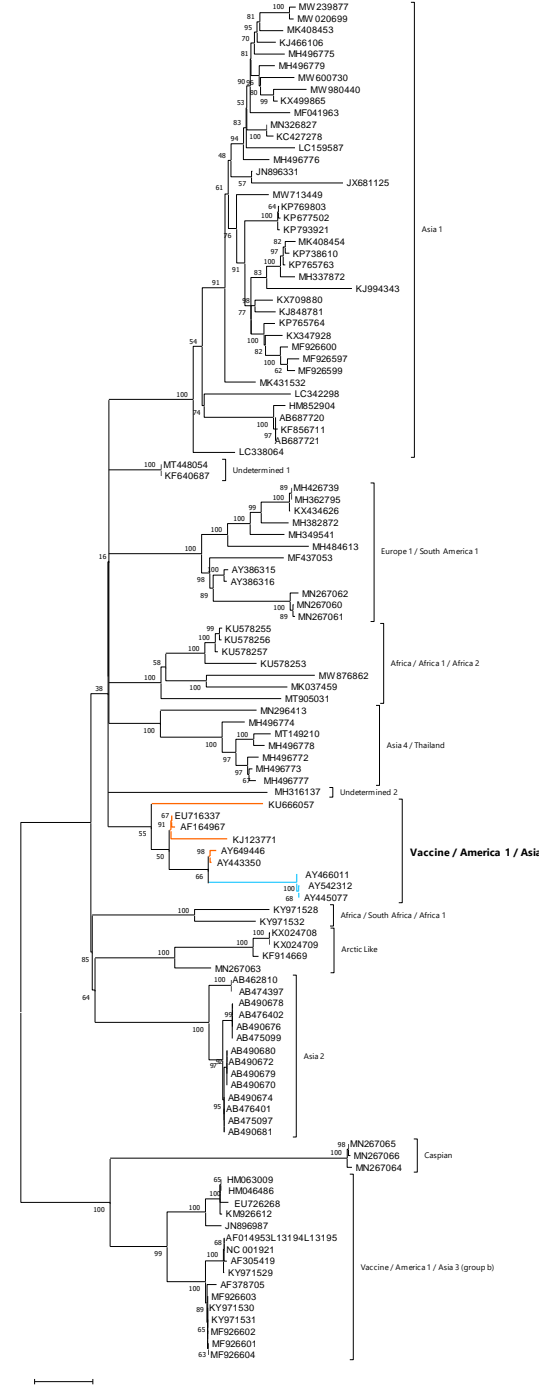

0.020

0.010
